# Supplementary material
Source: Elsevier journal article supplement (https://www.sciencedirect.com/science/article/pii/S0211139X17301725)
Supplement: mmc1 [file S0211139X17301725:mmc1.docx]

**ANEXO 1**

Composición del Comité Asesor (Tabla 1) y el Comité de Expertos (Tabla 2) del Proyecto.

| **Perfil** | **Profesional** | **Cargo/Institución** |
| --- | --- | --- |
| N | Pablo Martínez-Lage | Director Científico Fundación CITA-Alzhéimer Fundazioa (Donostia) |
| P | Manuel Martín Carrasco | Clínica Psiquiátrica Padre Menni (Pamplona)  Director del Instituto de Investigaciones Psiquiátricas (Bilbao) |
| G | Francesc Formiga Pérez | Director del Programa de Geriatría, Hospital Universitari de Bellvitge (L'Hospitalet de Llobregat) |
| AP | Enrique Arrieta Antón | Centro de Salud de Segovia Rural (Segovia)  Miembro del Grupo de Trabajo de Neurología de SEMERGEN |
| AFA | Jesús Rodrigo Ramos | Director Ejecutivo de la Confederación Española de Asociaciones de Familiares de personas con Alzheimer y otras demencias-CEAFA (Pamplona) |

|  | **Perfil** | **Profesional** | **Cargo/Institución** |
| --- | --- | --- | --- |
| **Andalucía** | N | Cristóbal Carnero Pardo | Complejo Hospitalario Universitario de Granada (Granada) FIDYAN Neurocenter (Granada) |
| P | Ángel Moríñigo Domínguez | Departamento de Psiquiatría. Facultad de Medicina, Universidad de Sevilla (Sevilla) |
| G | José Manuel Marín Carmona | Presidente de la Sociedad Andaluza de Geriatría y Gerontología. Coordinador del Programa de Memoria y Demencias del Ayto. de Málaga (Málaga) |
| AP | Juan Carlos Martí Canales | Unidad de Gestión Clínica de Cadiar (Granada). Miembro del Grupo de Trabajo de Neurología de SEMERGEN |
| AFA | María Dolores Almagro Cabrera | Presidenta de la Federación Granadina de Alzheimer (FEGRAFA) (Granada). Tesorera de la Confederación Andaluza de Alzheimer (CONFEAFA) (Sevilla). Vocal de la Confederación Española de Alzheimer (CEAFA) (Pamplona) |
| **Aragón** | N | Eugenia Marta Moreno | Coordinadora de la Consulta monográfica de Trastornos Cognitivos y Conductuales del Servicio de Neurología del Hospital Miguel Servet (Zaragoza) |
| P | Francisco Javier Olivera Pueyo | Programa de Psicogeriatría - Medicina Psicosomática Hospital "San Jorge" (Huesca) |
| AFA | Rosa María Cantabrana Alútiz | Presidenta de CEAFA. Vicepresidenta de la Federación Aragonesa de Alzheimer. Presidenta de la Asociación de Familiares de EA (Zaragoza) |
| **Asturias** | N | Carmen Martínez Rodríguez | Hospital de Cabueñes (Gijón) |
| G | José Gutiérrez Rodríguez | Área de Gestión Clínica de Geriatría. Hospital Monte Naranco (Oviedo) |
| AFA | Laureano Caicoya | Presidente Fundación Alzheimer Asturias. Secretario General Asociación Alzheimer Asturias (AFA-ASTURIAS) (Oviedo) |
| **Baleares** | N | Guillermo Amer Ferrer | Unidad de Neurología Cognitiva y Conducta.  Hospital Universitari Son Espases (Palma de Mallorca) |
| P | Alba Félez Viñas | Hospital de Manacor (Manacor) |
| AFA | Victoria Florit | Secretaria de la Federación de Asociaciones de familiares de enfermos con Alzheimer de las Islas Baleares (Mahón) |
| **Canarias** | N | José Antonio Rojo Aladro | Responsable de la Consulta Monográfica de Demencias. Hospital Universitario de Canarias (Tenerife) |
| P | Eugenio R. Chinea Cabello | Hospital Universitario de Canarias (Tenerife) |
| AFA | Lorena Álvarez Piñera | Vocal de CEAFA. Presidenta de la Federación de Asociaciones de Familiares de Enfermos de Alzheimer de la Comunidad Autónoma de Canarias (Las Palmas de Gran Canaria) |
| **Cantabria** | N | Pascual Sánchez-Juan | Hospital Universitario Marqués de Valdecilla (Santander). IDIVAL. CIBERNED |
| G | Carlos Fernández-Viadero | Hospital Universitario Marqués de Valdecilla (Santander) |
| AFA | Mónica Pérez Pardo | AFAC-Asociación de Familiares de Enfermos de Alzheimer de Cantabria (Santander) |
| **Castilla y León** | N | Miguel Goñi Imizcoz | Responsable del área de Demencias. Hospital Universitario de Burgos (Burgos) |
| P | Manuel A. Franco Martín | Jefe del Servicio de Psiquiatría y Salud Mental. Complejo Asistencial de Zamora (Zamora) |
| AP | Pablo Gregorio Baz Rodríguez | Coordinador del C.S. Ciudad Rodrigo (Salamanca),  Coordinador Grupo Trabajo Neurología SEMERGEN,  Vicepresidente SEMERGEN Castilla y León |
| AFA | Domingo Aceves Martín | Vicepresidente de CEAFA (Pamplona). Vicepresidente de la Federación de Familiares de EA de Castilla y León (Valladolid) |
| **Castilla-La Mancha** | N | Juan Pablo Cabello de la Rosa | Hospital General Universitario de Ciudad Real (Ciudad Real) |
| G | Pedro Abizanda Soler | Jefe de Servicio de Geriatría, Complejo Hospitalario Universitario de Albacete (Albacete). Jefe de Grupo CIBERFES (CIBER de Fragilidad y Envejecimiento Satisfactorio) |
| AP | Antonio Alonso Verdugo | Centro de Salud Tarancón (Cuenca). Miembro del Grupo de Trabajo Nacional de Dolor y Salud Mental SEMERGEN, Vocal de Cuenca de SEMERGEN Castilla La Mancha |
| AFA | Aurora Ortiz López | Miembro de la Junta de Gobierno de CEAFA (Pamplona), Presidenta de la Federación de Asociaciones de Familiares de Personas con Alzheimer y Otras Demencias de Castilla La Mancha (FEDACAM) (Albacete) |
| **Cataluña** | N | Ramón Reñé Ramírez | Jefe de Sección de Neurología. Coordinador de la Unidad de Demencias Hospital Universitari de Bellvitge (L'Hospitalet de Llobregat) |
| P | Manel Sánchez Pérez | Coordinador Unidad de Psiquiatría Geriátrica y Área Sociosanitaria. Hospital Sagrat Cor. Martorell (Barcelona) |
| G | Isabel Fort Almiñana | Jefe Clínico de la Unidad de Atención a la Demencia, Servicio de Geriatría y Curas Paliativas, Serveis Assistencials (Badalona) |
| AP | M Carmen Martínez Altarriba | Secretaria General SEMERGEN Solidaria, Grupo de Trabajo de Neurología de SEMERGEN |
| AFA | Josep Gasulla Algueró | Secretario de la Confederación Española de Alzheimer CEAFA (Pamplona) |
|  |  |  |  |
|  |  |  |  |
|  |  |  |  |
|  |  |  |  |
| **Comunidad Valenciana** | N | Antonio del Olmo Rodríguez | Coordinador de la Unidad de diagnóstico de la Enfermedad de Alzheimer y otros trastornos cognitivos. Jefe de sección de Neurología. Hospital Universitario Dr. Peset (Valencia) |
| G | Francisco José Tarazona Santabalbina | Hospital Universitario de La Ribera (Alcira) |
| AP | Francisco Javier Sanz García | Departamento de Salud de Alcoy. Centro de Salud de Castalla (Alicante). Coordinador Nacional Grupo de trabajo de Gestión Sanitaria de SEMERGEN. Vocal junta directiva SEMERGEN Comunidad Valenciana |
| AFA | Rosana Garrido Navarro | Directora de la Secretaría Técnica de la Federació Valenciana d’Associacions de Familiars de Persones amb Alzheimer (FEVAFA) (Alaquás) |
| **Extremadura** | N | Fernando Castellanos Pinedo | Hospital Virgen del Puerto (Plasencia) |
| AP | Jacinto Espinosa García | Centro de Salud Villanueva de la Serena Norte (Badajoz) |
| AFA | Matilde Escobar Blázquez | Presidenta de la Federación de Asociaciones de Familiares de enfermos de Alzheimer de Extremadura (Mérida) |
| **Galicia** | N | Rosa Mª Rodríguez Fernández | Complexo Hospitalario Universitario de Ourense (Ourense) |
| P | Raimundo Mateos Álvarez | Responsable de la Unidad de Psicogeriatría,  Servicio de Psiquiatría. Complejo Universitario de Santiago de Compostela (Santiago de Compostela),  Presidente de la *International Psychogeriatric Association* (IPA) |
| AP | Daniel Rey Aldana | Centro de Salud de A Estrada (Pontevedra),  XXI Santiago de Compostela (Santiago de Compostela), Presidente de SEMERGEN Galicia |
| AFA | Javier Hermida | Coordinador de la Oficina Técnica de la Federación Alzheimer Galicia-FAGAL (Santiago de Compostela) |
| **La Rioja** | G | Fernando Martín Ciancas | Presidente de la Sociedad Riojana de Geriatría y Gerontología. Director Médico Viamed La Rioja (Lardero) |
| AFA | Anabella Martínez Pérez | Asociación de Familiares de Enfermos de Alzheimer de La Rioja-AFA Rioja (Logroño) |
| **C. Madrid** | N | Javier Olazarán Rodríguez | Hospital General Universitario Gregorio Marañón (Madrid) |
| P | Luis Agüera Ortiz | Jefe de Sección del Servicio de Psiquiatría,  Hospital Universitario 12 de Octubre (Madrid) |
| G | Javier Gómez Pavón | Jefe del Servicio de Geriatría. Hospital Universitario de la Cruz Roja San José y Santa Adela (Madrid) |
| AP | Araceli Garrido Barral | Centro de Salud Barrio del Pilar (Madrid). Grupo de Trabajo de Demencias de las SEMFYC |
| AFA | Rosa Brescané Bellver | Miembro de la Plataforma de Asociaciones de Pacientes Crónicos (Madrid). Tesorera de CEAFA (Pamplona) |
| **R. de Murcia** | N | Carmen Antúnez Almagro | Directora de la Unidad de Demencias. Hospital Clínico Universitario Virgen de la Arrixaca (Murcia) |
| AP | Juan José Gomariz García | Coordinador nacional de SEMERGEN del grupo de trabajo de medicina basada en la evidencia,  Grupo de trabajo de Neurología de SEMERGEN |
| AFA | Raquel López Rojo | AFAMUR (Asociación de Familiares de Enfermos de Alzheimer de la Región de Murcia) (Murcia) |
|  |  |  |  |
|  |  |  |  |
| **C.F. Navarra** | N | M.ª Rosa Larumbe Ilundain | Coordinadora Unidad de Deterioro Cognitivo y Demencia, Servicio de Neurología del Complejo Hospitalario de Navarra (Pamplona) |
| P | José Joaquín Roldán Larreta | Clínica Psicogeriátrica Josefina Arregui (Alsasua) |
| G | Inés Francés Román | Agencia Navarra de Autonomía y Desarrollo de las Personas (Pamplona) |
| AP | Félix Zubiri Sáenz | Especialista en Medicina Familiar y Comunitaria |
| AFA | Victoria Erice Lacabe | Asociación de Familiares de enfermos de Alzheimer de Navarra, AFAN (Pamplona) |
| **País Vasco** | N | Alazne Gabilondo López | OSI Bidasoa (Hondarribia) |
| G | Enrique Arriola Manchola | Coordinador del Grupo de Demencias de la SEGG  Responsable Unidad de Memoria y Alzheimer  Hospital Berminghan - Fundación Matia (Donostia) |
| AFA | Marisa Ortigosa | Directora de la Asociación de Familiares y Amigos de Personas con Alzheimer y otras demencias de Gipuzkoa (AFAGI) (Donostia) |

**AFA:** Representantes de Asociaciones de Familiares de personas con Alzheimer y otras demencias;
